# Supplementary material
Source: PubMed Central journal article supplement (PMC3649072)
Supplement: NIHMS464442-supplement-Supplemental_Data.pdf [file NIHMS464442-supplement-Supplemental_Data.pdf]

## Supplement Material

### **Disruption of Endothelial Peroxisome Proliferator-activated Receptor $\gamma$ Accelerates Diet-induced Atherogenesis in Low-density Lipoprotein Receptor-null Mice**

Aijuan Qu, Yatrik M. Shah, Soumen K. Manna, and Frank J. Gonzalez

Supplemental Table 1 Primer List

| qPCR               | Sequences                      |
|--------------------|--------------------------------|
| $\beta$ -actin FWD | 5'-TATTGGCAACGAGCGGTTCC-3'     |
| $\beta$ -actin REV | 5'-GGCATAGAGGTCTTTACGGATGTC-3' |
| PPARG FWD          | 5'-TCTGGGAGATTCTCCTGTTGA-3'    |
| PPARG REV          | 5'-GGTGGGCCAGAATGGCATCT-3'     |
| MCP-1 FWD          | 5'-CCTGCTGTTACAGTTGCC-3'       |
| MCP-1 REV          | 5'-ATTGGGATCATCTTGCTGGT-3'     |
| CD68 FWD           | 5'-ATCCCCACCTGTCTCTCTCA-3'     |
| CD68 REV           | 5'-ACCGCCATGTAGTCCAGGTA-3'     |
| F4/80 FWD          | 5'-GGATGTACAGATGGGGGATG-3'     |
| F4/80 REV          | 5'-CATAAGCTGGGCAAGTGGTA-3'     |
| VCAM-1 FWD         | 5'-TCGGGCGAAAAATAGTCCTT-3'     |
| VCMA-1 REV         | 5'-CCGGCATATACGAGTGTGAA-3'     |
| IL-1 $\beta$ FWD   | 5'-GGTCAAAGGTTTGGGAAGCAG-3'    |
| IL-1 $\beta$ REV   | 5'-TGTGAAATGCCACCTTTTGA-3'     |
| TNF- $\alpha$ FWD  | 5'-AGGGTCTGGGCCATAGAACT-3'     |
| TNF- $\alpha$ REV  | 5'-CCACCACGCTCTTCTGTCTAC-3'    |
| AGTR1-FWD          | 5'-AAGGGCCATTTTGCTTTTCT-3'     |
| AGTR1-REV          | 5'-AACTCACAGCAACCCTCCAA-3'     |
| eNOS-FWD           | 5'-CCTAGGGGAGCTGTTGTACG-3'     |
| eNOS-REV           | 5'-GACCAGCACATTTGGCAAT-3'      |

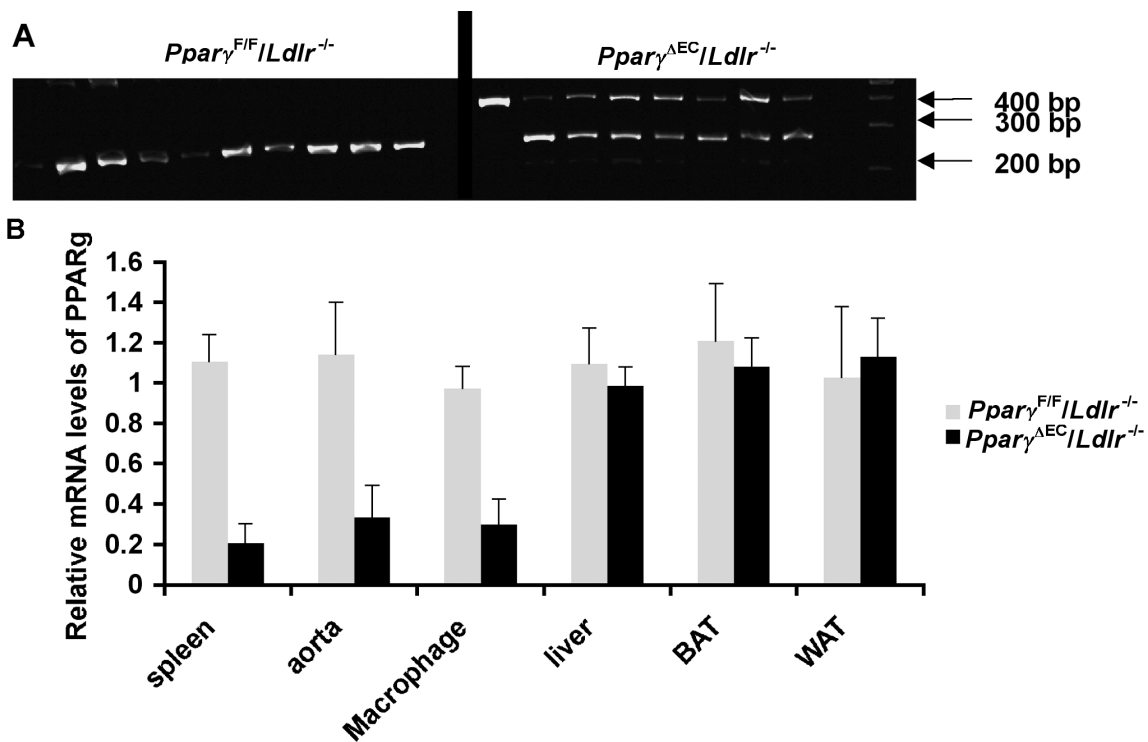

**Supplemental figure I. Disruption of PPAR $\gamma$  gene via Cre-loxP-mediated recombination.**

A. PCR diagnostic for Tie2-Cre-mediated recombination of PPAR $\gamma$  allele in genomic DNA isolated from tissues of *Pparγ<sup>F/F</sup>/Ldlr<sup>-/-</sup>* or *Pparγ<sup>EC</sup>/Ldlr<sup>-/-</sup>* mice.

B. qPCR analysis of PPAR $\gamma$  mRNA expression in the tissues from *Pparγ<sup>F/F</sup>/Ldlr<sup>-/-</sup>* or *Pparγ<sup>EC</sup>/Ldlr<sup>-/-</sup>* mice. For qPCR analysis the expression was normalized to  $\beta$ -actin and each bar represents the mean value  $\pm$  S.D. \*\*P<0.01 compared to wild-type floxed littermates.

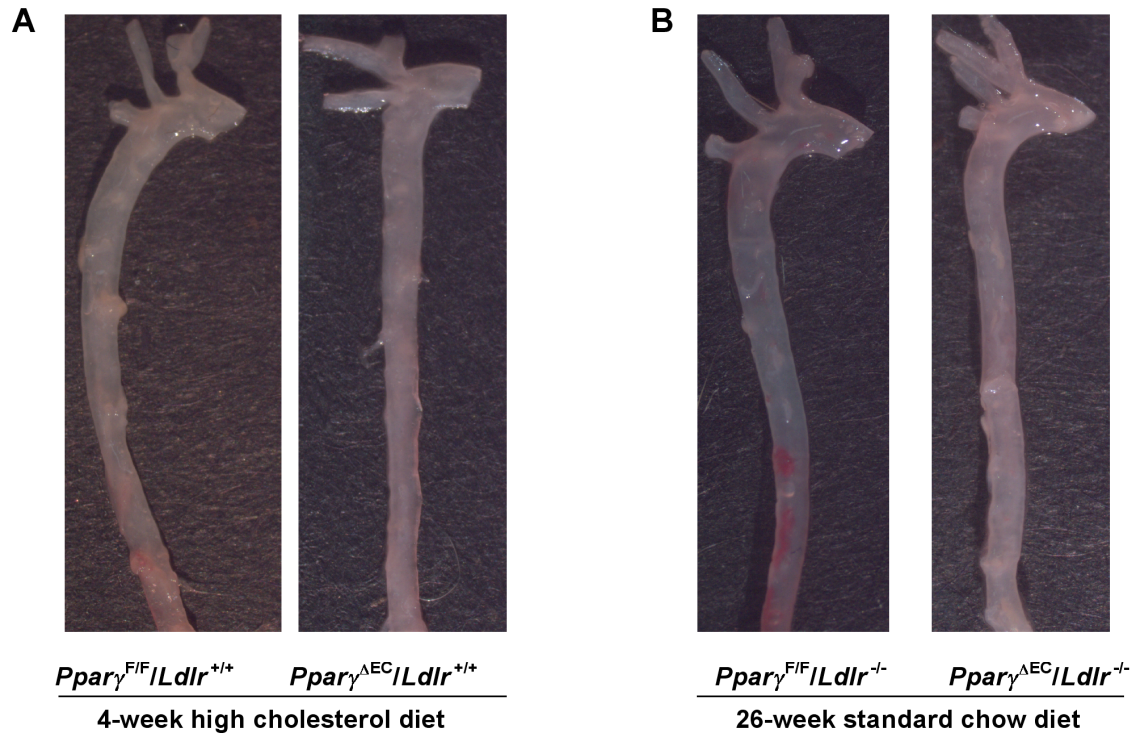

**Supplemental figure II. No atherosclerotic lesions in *PPARγ<sup>EC</sup>/Ldlr<sup>+/+</sup>* on high-cholesterol diet or *Pparγ<sup>EC</sup>/Ldlr<sup>-/-</sup>* mice on standard chow diet.**

A. Aortas from *Pparγ<sup>F/F</sup>/Ldlr<sup>+/+</sup>* or *Pparγ<sup>EC</sup>/Ldlr<sup>+/+</sup>* mice fed with high cholesterol diet for 4 weeks. Of note, no lesions were observed in the aortic arch.

B. Aortas from *Pparγ<sup>F/F</sup>/Ldlr<sup>-/-</sup>* or *Pparγ<sup>EC</sup>/Ldlr<sup>-/-</sup>* mice on standard chow diet for 26 weeks. No lesions were observed in the aortic arch.

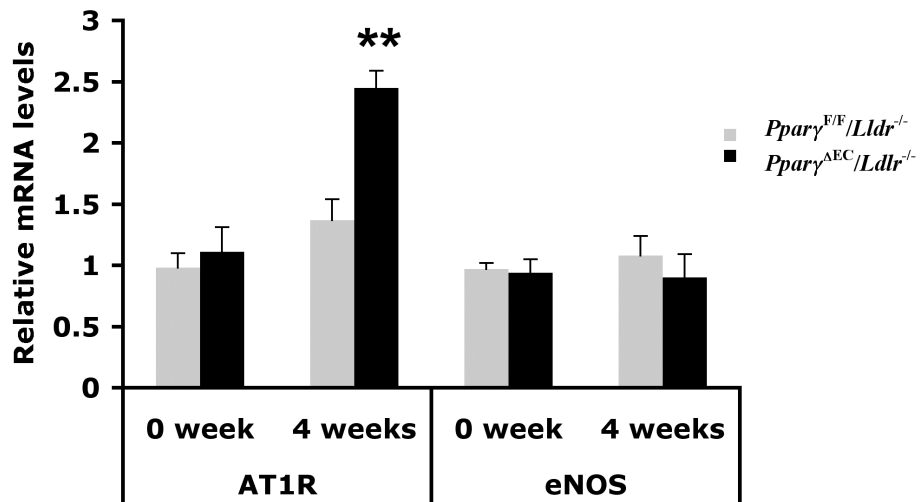

**Supplemental figure III. AT<sub>1</sub>R and eNOS mRNA levels in *Pparγ<sup>F/F</sup>/Ldlr<sup>-/-</sup>* or *Pparγ<sup>ΔEC</sup>/Ldlr<sup>-/-</sup>* mice.**

Messenger RNA was isolated from *Pparγ<sup>F/F</sup>/Ldlr<sup>-/-</sup>* or *Pparγ<sup>ΔEC</sup>/Ldlr<sup>-/-</sup>* mice fed with standard chow diet or high cholesterol diet for 4 weeks, \*\*p<0.01, n=5. AT1R and eNOS mRNAs were measured by qPCR.
